# Supplementary material for: Ultrabroad spectral response and excellent SERS performance of PbS-assisted Au/PbS/Au nanostars
Source: Royal Society of Chemistry journal article supplement (doi:10.1039/d2nr04666k), 2022-01-01
Supplement: d2nr04666k1.pdf [file d2nr04666k1.pdf]

## Supporting Material for

# Ultrabroad Spectral Response and Excellent SERS Performance of PbS-assisted Au/PbS/Au Nanostars

*Jing-Ru Feng,<sup>1</sup> Zhi-Rui Zhao,<sup>1</sup> Zhong-Long Xiong,<sup>1</sup> Hao-Sen Kang,<sup>2</sup> Si-Jing Ding,<sup>1,a)</sup>*

*Liang Ma,<sup>2,a)</sup> and Li Zhou<sup>3,a)</sup>*

<sup>1</sup>School of Mathematics and Physics, China University of Geosciences (Wuhan), Wuhan 430074,  
P. R. China

<sup>2</sup>Hubei Key Laboratory of Optical Information and Pattern Recognition, Wuhan Institute of  
Technology, Wuhan 430205, P. R. China

<sup>3</sup>School of Physics and Technology, Wuhan University, Wuhan 430072, P. R. China

### **Corresponding Author**

<sup>a)</sup>E-mail: [dingsijing@cug.edu.cn](mailto:dingsijing@cug.edu.cn);

<sup>a)</sup>E-mail: [maliang@wit.edu.cn](mailto:maliang@wit.edu.cn);

<sup>a)</sup>E-mail: [zhouli@whu.edu.cn](mailto:zhouli@whu.edu.cn)

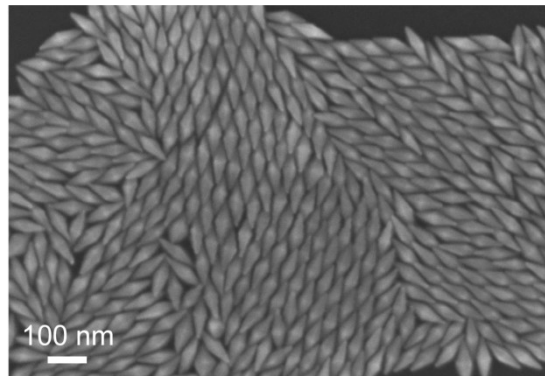

**Figure S1.** SEM image of Au nanobipyramids.

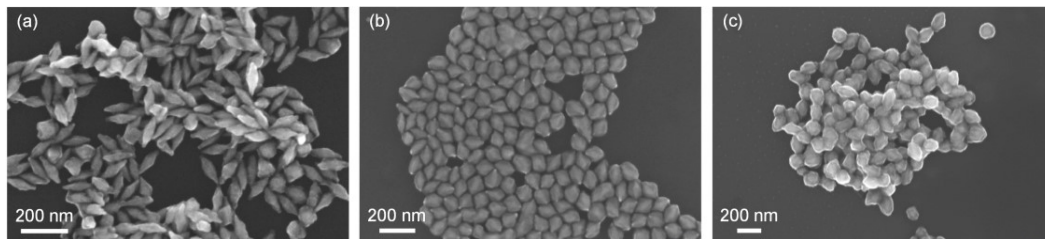

**Figure S2.** SEM images of Au BPs@PbS nanoparticles prepared by adding different amounts of Pb(Ac)<sub>2</sub>, (a) 5 μL, (b) 20 μL, (c) 50 μL. The concentration of Pb(Ac)<sub>2</sub> is 0.01 M.

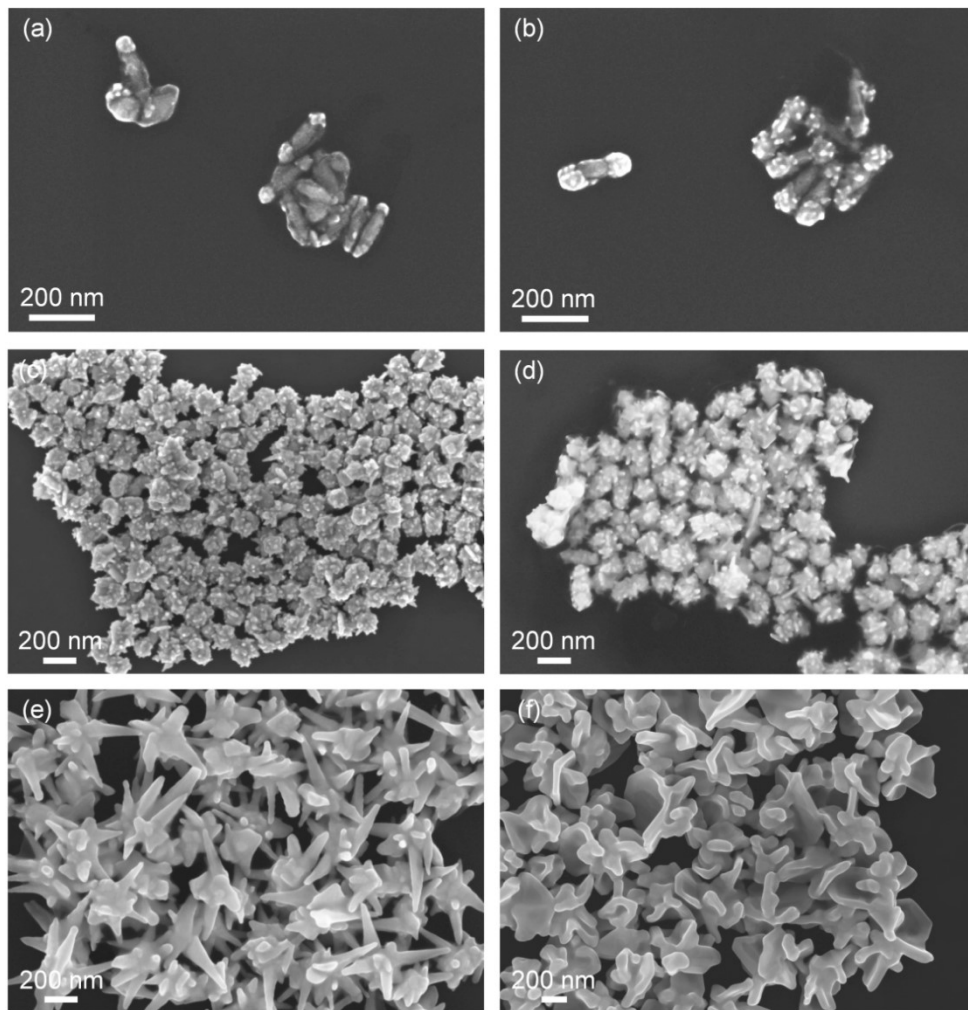

**Figure S3.** SEM images of Au/PbS/Au nanostars prepared with adding different amount of  $\text{HAuCl}_4$ . The amount of  $\text{HAuCl}_4$  is (a) 5  $\mu\text{L}$  (5 mM), (b) 20  $\mu\text{L}$  (5 mM), (c) 100  $\mu\text{L}$  (5 mM), (d) 50  $\mu\text{L}$  (15 mM), (e) 200  $\mu\text{L}$  (15 mM), (f) 500  $\mu\text{L}$  (15 mM).

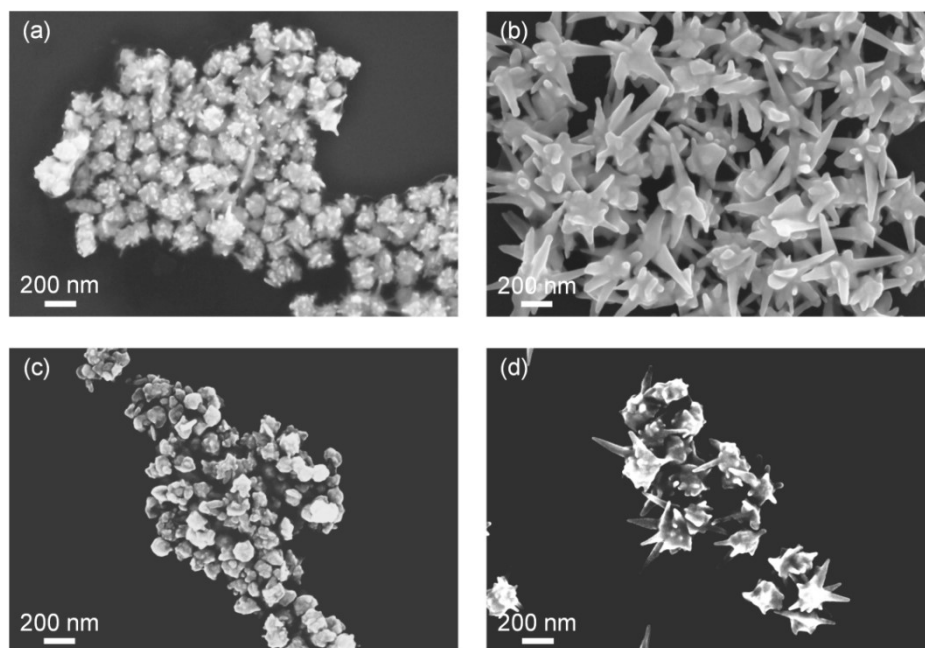

**Figure S4.** SEM images of Au/PbS/Au nanostars without/with the addition of HCl. (a) Au/PbS/Au nanostars with 50  $\mu\text{L}$   $\text{HAuCl}_4$  without HCl. (b) Au/PbS/Au nanostars with 200  $\mu\text{L}$   $\text{HAuCl}_4$  without HCl. (c) Add HCl to the sample in figure S4(a). (d) Add HCl to the sample in figure S4(b).

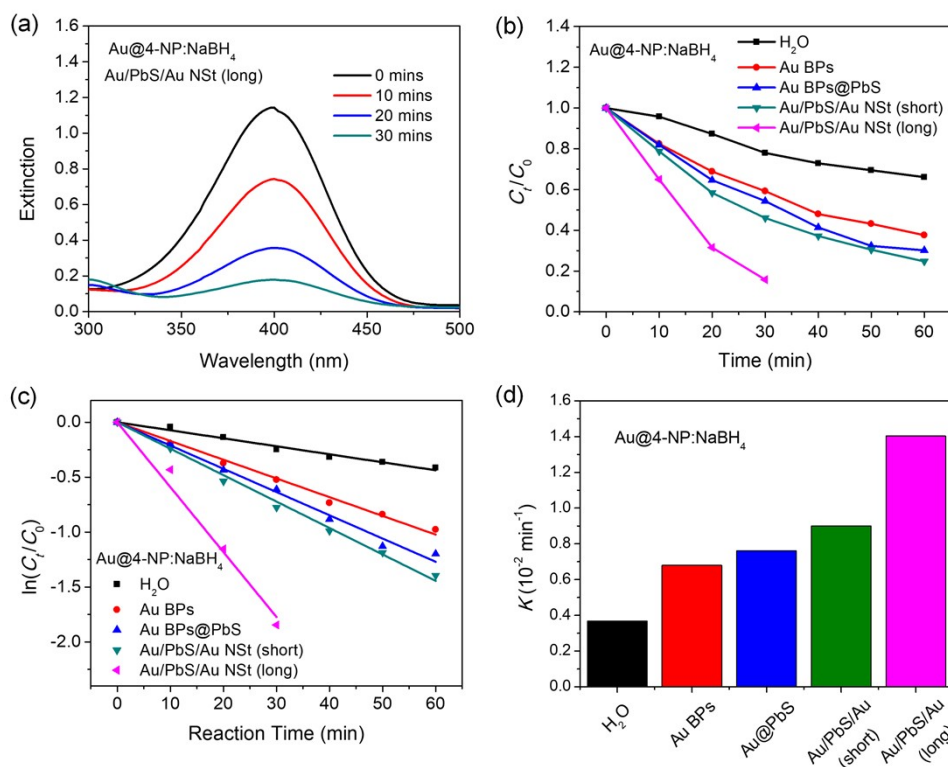

**Figure S5.** Size of photocatalytic activity of different nanoparticles in 4-NP:NaBH<sub>4</sub>. (a) Extinction spectra of 4-NP:NaBH<sub>4</sub> with Au/PbS/Au nanostars (Au(180)) recorded at the reaction time of 0, 10, 20, and 30 mins. (b) Peak extinction intensity at 664 nm of 4-NP molecules as a function of reaction time  $t$ . (c) Catalytic degradation curves of 4-NP over different catalysts. (d) Reaction rate  $K$  for different samples.

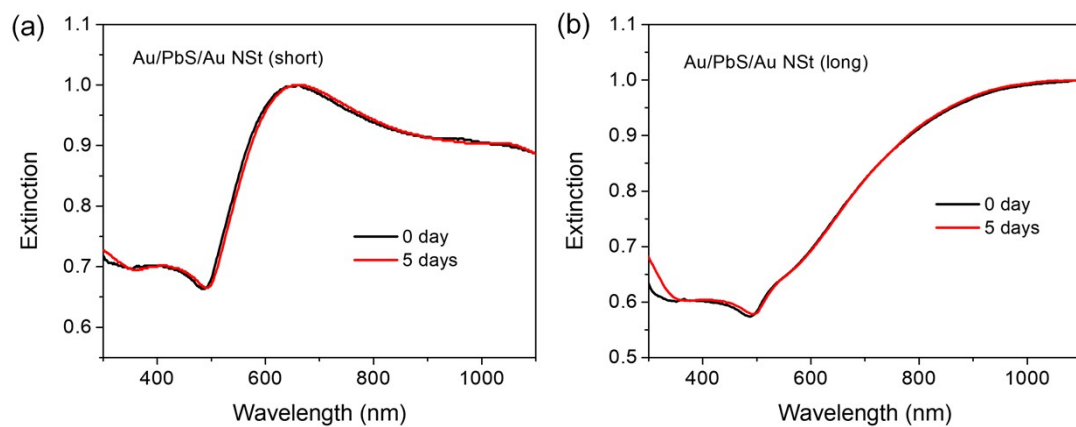

**Figure S6.** Normalized extinction spectra of Au/PbS/Au nanostars (short) (Au(50)) (a) and Au/PbS/Au nanostars (long) (Au(200)) (b) with 0 day and 5 days.
